# Supplementary material for: Retinal Arteriolar Caliber Predicts Incident Retinopathy
Source: Oxford University Press journal article supplement (doi:10.2337/dc07-1622), 2008-03-28
Supplement: dc071622onlinesupplement.doc [file dc071622onlinesupplement.doc]

**ONLINE SUPPLEMENTAL MATERIAL**

Detailed methodology for the AusDiab study has been described (9-14). Diabetes classification of participants was based on a 75g oral glucose tolerance test using WHO recommendations. Participants were classified as diabetes if they had fasting plasma glucose ≥7.0 mmol/l or 2 h plasma glucose ≥11.1mmol/l at the examination or they reported a history of physician-diagnosed diabetes and were currently using treatment (insulin or oral hypo-glycemic medications). Type 1 diabetes was defined as commencement of insulin treatment within 2 years of diagnosis (if diabetes onset was at age 40 years or later) and with current BMI <27 kg/m2. Otherwise they were classified as having type 2 diabetes. Impaired glucose tolerance (IGT) was defined when the fasting plasma glucose was <7.0 mmol/l and the 2 h plasma glucose was ≥7.8 and <11.1 mmol/l, and impaired fasting glucose (IFG) was defined as fasting plasma glucose was ≥6.1 and <7.0 mmol/l and the 2 h plasma glucose was <7.8 mmol/l. All other participants were classified as having normal glucose tolerance (11; 19).

Of the original cohort (n=11,247), all participants identified as having diabetes, impaired fasting glucose or impaired glucose tolerance and a systematic random sample of participants with normal glucose tolerance were invited to participate in a sub-study of diabetic complications (11). Of the 2,476 (89%) participants in this sub-study, we excluded 299 (12.1%) without gradable photographs for retinopathy at baseline, 201 (8.1%) with prevalent retinopathy in either eye at baseline, 369 (14.9%) with photographs unsuitable for retinal vessel measurement and 701 (28.3%) who either did not return or did not have gradable photographs for retinopathy at the 5-year follow-up, leaving 906 participants for analysis. Included participants were younger, more educated, less likely to have diabetes, and had lower systolic blood pressure than excluded participants (data not shown).

At baseline and the 5-year follow-up visits, retinal photographs were taken of both eyes using a non-mydriatic digital fundus camera (Canon CR6-45NM; Canon, Lake Success, NY, USA): one photograph centred on the optic disc and the other on the macula (9-11). Digital photographs were then viewed on color monitors. A single trained grader, masked to participants’ characteristics, graded all photographs according to the simplified version of the Wisconsin grading system (15). Incident retinopathy was defined as the presence of retinal microaneurysm(s) and/or hemorrhage(s) at the 5-year examination. All cases of incident retinopathy were adjudicated by a retinal specialist. Intra-grader reliability was assessed by re-grading of a random sample of 167 photographs giving an unweighted kappa of 0.73 (11).

Retinal vascular calibre was measured from baseline photographs of the left eye using a computer-assisted vessel measurement system (Retinal Analysis; Optimate, Madison, WI, USA) that uses microdensitometry to detect the vessel edge (18). Based on a standard protocol, trained graders masked to participant characteristics, identified each vessel in an image as an arteriole or venule. Each segment of each vessel coursing through a specified area (0.5–1.0 disc diameter surrounding the optic disc) is then assessed individually. The software calculates the central and average width of 5 equidistant measures of that vessel segment (in micrometers). The measurements are summarized into a central retinal arteriolar equivalent (CRAE) and central retinal venular equivalent (CRVE), according to formulas given by Hubbard *et al*. (16) and modified by Knudtson *et al*. (17). The formula allows individual vessel diameters to be combined into summary indices reflecting the average arteriolar and venular diameters of that eye. The inter-grader intra-class correlation coefficients for the CRAE and CRVE measures were 0.92 and 0.96, respectively, and the intra-grader intra-class correlation coefficients for CRAE and CRVE were 0.83 and 0.92, respectively (19).

**ACKNOWLEDGEMENTS**

This study was supported by the National Medical Research Council Grants No 350448 and 233200 and a Sylvia and Charles Viertel Charitable Foundation Grant.

Part of this work was presented at the Association for Research in Vision and Ophthalmology Annual Meeting 2007.
